# Supplementary material
Source: MDPI journal article supplement (https://www.mdpi.com/2073-4433/13/4/579)
Supplement: s1 [file s1]

Supplementary Materials

# Amine-Modified Biochar for the Efficient Adsorption of Carbon Dioxide in Flue Gas

Wengang Tian <sup>1</sup>, Yanxia Wang <sup>2</sup>, Jian Hao <sup>1</sup>, Tuo Guo <sup>3</sup>, Xia Wang <sup>4</sup>, Xiaoju Xiang <sup>1</sup> and Qingjie Guo <sup>1,\*</sup>

<sup>1</sup> State Key Laboratory of High-Efficiency Utilization of Coal and Green Chemical Engineering, Ningxia University, Yinchuan 750021, China; wengangtian@stu.nxu.edu.cn (W.T.); haojian@nxu.edu.cn (J.H.); xiangxiaoju@stu.nxu.edu.cn (X.X.)

<sup>2</sup> Department of Chemistry and Chemical Engineering, North Minzu University, Yinchuan 750021, China; 2021007@nmu.edu.cn

<sup>3</sup> Department of Chemistry, University College London, London WC1H 0AJ, UK; tuo.guo.20@ucl.ac.uk

<sup>4</sup> Department of Chemistry and Chemical Engineering, Weifang University, Weifang 261061, China; 20160012@wfu.edu.cn

\* Correspondence: qjguo@qust.edu.cn; Tel.: +86-951-206-2835

**Citation:** Tian, W.; Wang, Y.; Hao, J.; Guo, T.; Wang, X.; Xiang, X.; Guo, Q. Amine-Modified Biochar for the Efficient Adsorption of Carbon Dioxide in Flue Gas. *Atmosphere* **2022**, *13*, x. <https://doi.org/10.3390/atmos13040579>

Academic Editor: Marcelo I. Guzman

Received: 22 February 2022

Accepted: 31 March 2022

Published: 4 April 2022

**Publisher's Note:** MDPI stays neutral with regard to jurisdictional claims in published maps and institutional affiliations.

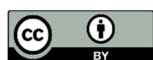

**Copyright:** © 2022 by the authors. Licensee MDPI, Basel, Switzerland. This article is an open access article distributed under the terms and conditions of the Creative Commons Attribution (CC BY) license (<http://creativecommons.org/licenses/by/4.0/>).

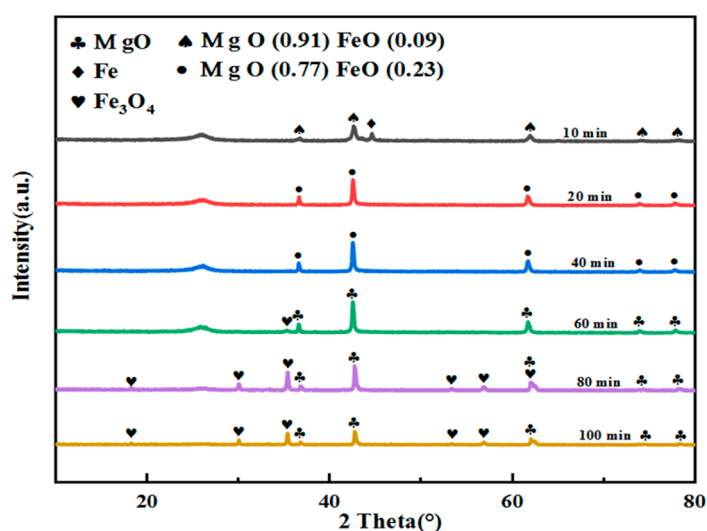

**Figure S1.** XRD spectra of metal oxide during the reaction process.

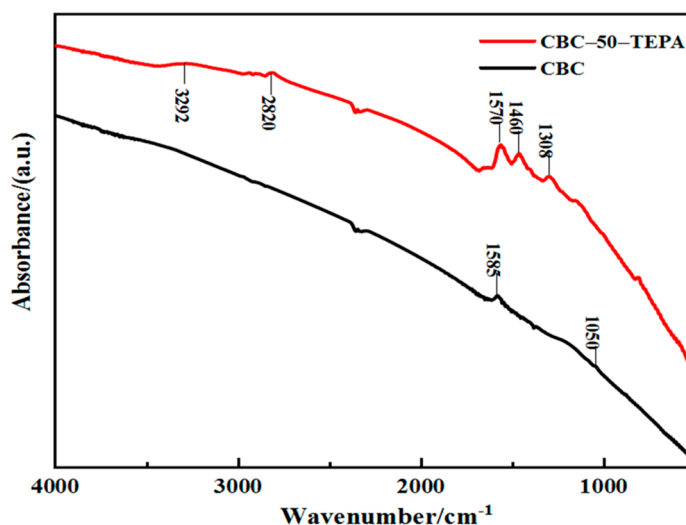

**Figure S2.** FTIR spectra of the CBC and CBC-50-TEPA.
